# Supplementary material
Source: PubMed Central journal article supplement (PMC1592455)
Supplement: neo0805_0373SD1.pdf [file neo0805_0373SD1.pdf]

**Table W1.** Statistical Differential Genes, Classified According to the Venn's Diagram (Figure 2).

| Venn Section | Gene Name                                                                            | Symbol  | Genbank  | Functional Classification                            | Ratio   |        |        | FDR     |
|--------------|--------------------------------------------------------------------------------------|---------|----------|------------------------------------------------------|---------|--------|--------|---------|
|              |                                                                                      |         |          |                                                      | ENT1/NL | ENT5/L | HCC/NL |         |
| 12           | fatty acid binding protein 7                                                         | Fabp7   | U02096   | trafficking/targeting proteins                       | 0.39*   | 0.71   | 0.4*   | 0.00040 |
| 12           | liver multidrug resistance-associated protein 6                                      | Abcc6   | U73038   | stress response proteins                             | 0.68*   | 0.61   | 0.42*  | 0.00050 |
| 12           | inter alpha-trypsin inhibitor, heavy chain 4                                         | Itih4   | Y11283   | protein turnover                                     | 2.68*   | 1.35   | 0.43*  |         |
| 12           | serine (or cysteine) proteinase inhibitor, clade A, member 1                         |         | M32247   | protein turnover                                     | 0.63*   | 0.48   | 0.57*  | 0.00032 |
| 12           | Lipase, hepatic                                                                      | Lipc    | M16235   | metabolism                                           | 2.71*   | 2.25   | 0.73*  |         |
| 12           | Rat senescence marker protein 2A gene, exons 1 and 2                                 | Smp2a   | X63410   | metabolism                                           | 5.67*   | 1.44   | 0.48*  |         |
| 12           | Cytochrome P450, subfamily IIC6                                                      | Cyp2c6  | K03501   | metabolism                                           | 2.08*   | 1.03   | 0.35*  |         |
| 12           | Cytochrome P450, subfamily IIC (mephenytoin 4-hydroxylase)                           | Cyp2c   | J02657   | metabolism                                           | 0.37*   | 0.34   | 0.14*  | 0.00049 |
| 12           | mitogen activated protein kinase 3                                                   | Mapk3   | M61177   | intracellular transducers/ effectors/modulators      | 0.46*   | 0.61   | 1.48*  |         |
| 12           | Complement component 4 binding protein, alpha                                        | C4bpa   | Z50051   | immune system proteins                               | 1.56*   | 1.14   | 0.63*  |         |
| 12           | Keratin 8                                                                            | Krt2-8  | M63482   | cytoskeleton/motility proteins                       | 0.69*   | 0.86   | 1.76*  |         |
| 12           | activin beta E                                                                       | Inhbe   | AF089825 | cell signaling, extracellular communication proteins | 1.35*   | 0.89   | 0.72*  |         |
| 20           | ribosomal protein L6                                                                 | Rpl6    | X87107   | translation                                          | 1.99    | 1.96   | 2.01*  | 0.00040 |
| 20           | N-Acetyltransferase-2                                                                | Nat2    | U17261   | stress response proteins                             | 0.61    | 0.48*  | 0.53*  | 0.00047 |
| 20           | Cathepsin L                                                                          | Ctsl    | Y00697   | protein turnover                                     | 1.12    | 1.33   | 1.63*  |         |
| 20           | angiotensinogen                                                                      | Agt     | L00091   | protein turnover                                     | 0.38    | 0.22*  | 0.38*  | 0.00039 |
| 20           | cyclin D1                                                                            | Ccnd1   | D14014   | oncogenes and tumor suppressors                      | 0.34    | 0.41*  | 2*     |         |
| 20           | UDP-glucuronosyltransferase                                                          | Ugt2b4  | U06273   | metabolism                                           | 1.48    | 1.97*  | 1.34*  | 0.00051 |
| 20           | enolase 1, alpha                                                                     | Eno1    | X02610   | metabolism                                           | 1.43    | 1.98*  | 1.28*  |         |
| 20           | hypoxanthine guanine phosphoribosyl transferase                                      | Hprt    | M63983   | metabolism                                           | 1.78    | 2.04*  | 1.24*  | 0.00049 |
| 20           | glutamic-pyruvate transaminase (alanine aminotransferase)                            | Gpt1    | D10354   | metabolism                                           | 0.6     | 0.43*  | 0.64*  | 0.00048 |
| 20           | cytochrome P-450PCN (PNCN inducible)                                                 | Cyp3a1  | M10161   | metabolism                                           | 0.69    | 0.44*  | 0.28*  | 0.00043 |
| 20           | Aldehyde dehydrogenase family 3, subfamily A1                                        | Aldh3a1 | J03637   | metabolism                                           | 0.69    | 4.33*  | 4.52*  | 0.00069 |
| 20           | NAD(P)H dehydrogenase, quinone 1                                                     | Nqo1    | J02608   | metabolism                                           | 2.02    | 3.79*  | 4.97*  | 0.00048 |
| 20           | Sterol carrier protein 2, liver                                                      | Scp2    | M34728   | metabolism                                           | 0.92    | 0.71*  | 0.59*  |         |
| 20           | UDP glycosyltransferase 1 family, polypeptide A7                                     | Ugt1a7  | U75903   | metabolism                                           | 1.74    | 3.01*  | 6.1*   | 0.00051 |
| 20           | alkaline phosphatase, tissue-nonspecific                                             | Alpl    | J03572   | metabolism                                           | 0.48    | 0.46*  | 1.85*  |         |
| 20           | 3-hydroxy-3-methylglutaryl-Coenzyme A synthase 2                                     | Hmgcs2  | M33648   | metabolism                                           | 0.38    | 0.21*  | 0.66*  | 0.00040 |
| 20           | glutamate cysteine ligase, modifier subunit                                          | Gclm    | L22191   | metabolism                                           | 1.26    | 2.42*  | 4.59*  | 0.00040 |
| 20           | Fatty acid binding protein 1, liver                                                  | Fabp1   | M35991   | intracellular transducers/ effectors/modulators      | 0.68    | 0.48*  | 0.33*  | 0.00052 |
| 20           | MHC class I-related protein (MR1)                                                    |         | Y13972   | immune system proteins                               | 0.7     | 0.33*  | 0.52*  | 0.00041 |
| 20           | Amiloride binding protein 1                                                          | Abp1    | X73911   | extracellular transport/ carrier proteins            | 0.54    | 0.61*  | 0.56*  | 0.00032 |
| 22           | nuclear factor I/A                                                                   | Nfia    | D78017   | transcription                                        | 0.57*   | 0.64   | 0.93   | 0.00051 |
| 22           | alpha thalassemia/mental retardation syndrome X-linked (RAD54 homolog, S.cerevisiae) | Atrx    | D64059   | transcription                                        | 0.49*   | 0.56   | 0.89   | 0.00040 |
| 22           | Fos like antigen 2                                                                   | Fosl2   | U18913   | transcription                                        | 0.45*   | 0.76   | 0.79   | 0.00042 |
| 22           | Early growth response 1                                                              | Egr1    | M18416   | transcription                                        | 0.44*   | 0.48   | 0.78   | 0.00051 |
| 22           | protein disulfide isomerase-related protein                                          | Txncd7  | X79328   | trafficking/targeting proteins                       | 2.05*   | 2.71   | 0.85   |         |
| 22           | ADP-ribosylation factor 3                                                            | Arf3    | L12382   | trafficking/targeting proteins                       | 0.62*   | 0.77   | 1.22   |         |
| 22           | ATP-binding cassette, sub-family C (CFTR/MRP), member 2                              | Abcc2   | L49379   | stress response proteins                             | 0.4*    | 0.66   | 1.21   |         |
| 22           | acidic ribosomal protein P0                                                          | Arbp    | Z29530   | RNA processing, turnover, and transport              | 2.97*   | 1.87   | 1.23   | 0.00053 |
| 22           | CDC-like kinase 3                                                                    | Clk3    | X94351   | RNA processing, turnover, and transport              | 0.46*   | 0.52   | 0.76   | 0.00042 |
| 22           | stress-induced-phosphoprotein 1 (Hsp70/Hsp90-organizing protein)                     | Stip1   | Y15068   | post-translational modification/protein folding      | 0.56*   | 0.71   | 1.3    |         |
| 22           | dihydropyrimidine dehydrogenase                                                      | Dpyd    | D85035   | metabolism                                           | 2.89*   | 1.9    | 0.77   |         |
| 22           | arachidonic acid epoxigenase                                                         | Cyp2c23 | X55446   | metabolism                                           | 1.63*   | 1      | 0.54   |         |

Table W1. (continued)

| Venn Section | Gene Name                                                                                 | Symbol  | Genbank  | Functional Classification                            | Ratio   |        |        | FDR     |
|--------------|-------------------------------------------------------------------------------------------|---------|----------|------------------------------------------------------|---------|--------|--------|---------|
|              |                                                                                           |         |          |                                                      | ENT1/NL | ENT5/L | HCC/NL |         |
| 22           | cytochrome P450, 1a1                                                                      | Cyp1a1  | X00469   | metabolism                                           | 2.96*   | 1.24   | 0.56   |         |
| 22           | sodium channel, voltage-gated, type 1, beta polypeptide                                   | Scn1b   | M91808   | membrane channels and transporters                   | 0.38*   | 0.5    | 1.13   | 0.00076 |
| 22           | ATPase, Ca++ transporting, cardiac muscle, slow twitch 2                                  | Atp2a2  | J04022   | membrane channels and transporters                   | 0.43*   | 0.58   | 0.79   | 0.00045 |
| 22           | phosphodiesterase 3B                                                                      | Pde3b   | Z22867   | intracellular transducers/ effectors/modulators      | 0.49*   | 0.59   | 0.73   |         |
| 22           | Transferrin                                                                               | Tf      | D38380   | extracellular transport/ carrier proteins            | 1.6*    | 1.48   | 0.9    | 0.00048 |
| 22           | insulin-like growth factor 1                                                              | Igf1    | M15480   | cell signaling, extracellular communication proteins | 2.53*   | 1.3    | 0.48   |         |
| 22           | kinase substrate HASPP28                                                                  | Pdap1   | U41744   | cell signaling, extracellular communication proteins | 0.63*   | 0.77   | 1.4    |         |
| 22           | Follicle stimulating hormone receptor                                                     | Fshr    | L02842   | cell receptors (by ligands)                          | 0.42*   | 0.6    | 1      | 0.00039 |
| 22           | transforming growth factor, beta receptor 3                                               | Tgfr3   | M77809   | cell receptors (by ligands)                          | 0.36*   | 0.63   | 0.71   | 0.00044 |
| 22           | nuclear receptor subfamily 2, group F, member 6                                           | Nr2f6   | AF003926 | cell receptors (by activities)                       | 0.63*   | 0.77   | 0.86   | 0.00045 |
| 40           | ribosomal protein S5                                                                      | Rps5    | X58465   | translation                                          | 4.27*   | 4.95*  | 1.39*  | 0.00040 |
| 40           | nuclear factor of kappa light chain gene enhancer in B-cells inhibitor, alpha             | Nfkbia  | X63594   | transcription                                        | 0.48*   | 0.59*  | 1.19*  |         |
| 40           | Inhibitor of DNA binding 3, dominant negative helix-loop-helix protein                    | Id3     | D10864   | transcription                                        | 0.42*   | 0.39*  | 1.56*  |         |
| 40           | Apolipoprotein E                                                                          | ApoE    | J02582   | trafficking/targeting proteins                       | 0.21*   | 0.2*   | 0.8*   | 0.00040 |
| 40           | glutathione S-transferase, alpha 1                                                        | Gsta5   | K01932   | stress response proteins                             | 3*      | 3.82*  | 2.01*  | 0.00038 |
| 40           | Metallothionein                                                                           | Mt1a    | J00750   | stress response proteins                             | 5.08*   | 2.29*  | 0.55*  | 0.00186 |
| 40           | glutathione-S-transferase, alpha type2                                                    | Gsta2   | K01931   | stress response proteins                             | 5.29*   | 7.08*  | 2.8*   | 0.00011 |
| 40           | solute carrier family 21, member 1                                                        | Slc21a1 | L19031   | stress response proteins                             | 0.49*   | 0.44*  | 0.28*  | 0.00042 |
| 40           | endothelin converting enzyme 1                                                            | Ece1    | D29683   | protein turnover                                     | 0.35*   | 0.4*   | 0.8*   | 0.00046 |
| 40           | Glutathione peroxidase 1                                                                  | Gpx1    | X12367   | protein turnover                                     | 0.54*   | 0.41*  | 0.54*  | 0.00031 |
| 40           | glucose regulated protein, 58 kDa                                                         | Grp58   | D63378   | protein turnover                                     | 0.24*   | 0.4*   | 0.85*  | 0.00040 |
| 40           | protein disulfide isomerase related protein (calcium-binding protein, intestinal-related) | Erp70   | M86870   | post-translational modification/ protein folding     | 0.42*   | 0.62*  | 0.65*  | 0.00049 |
| 40           | Superoxide dismutase 2, mitochondrial                                                     | Sod2    | X56600   | metabolism                                           | 0.4*    | 0.62*  | 1.14*  |         |
| 40           | fatty acid Coenzyme A ligase, long chain 2                                                | Acs1    | D90109   | metabolism                                           | 0.64*   | 0.43*  | 0.45*  | 0.00052 |
| 40           | glycerol kinase                                                                           | Gyk     | D16102   | metabolism                                           | 0.31*   | 0.34*  | 0.46*  | 0.00031 |
| 40           | glutathione S-transferase, mu type 3 (Yb3)                                                | Gstm3   | J02744   | metabolism                                           | 3.78*   | 4.86*  | 2.48*  | 0.00018 |
| 40           | peroxiredoxin 5                                                                           | Prdx6   | Y17295   | metabolism                                           | 2.35*   | 2.5*   | 1.65*  | 0.00049 |
| 40           | sulfotransferase, estrogen preferring                                                     | Ste     | M86758   | metabolism                                           | 0.5*    | 0.53*  | 0.15*  | 0.00043 |
| 40           | alcohol dehydrogenase 1                                                                   | Adh1    | M15327   | metabolism                                           | 10.66*  | 11.57* | 3.74*  | 0.00041 |
| 40           | glutathione S-transferase, pi 1                                                           | Gstp1   | X02904   | metabolism                                           | 13.59*  | 21.89* | 22.76* | 0.00003 |
| 40           | glutamate-cysteine ligase, catalytic subunit                                              | Gclc    | J05181   | metabolism                                           | 2.28*   | 4.05*  | 7.22*  | 0.00012 |
| 40           | aldehyde dehydrogenase family 1, subfamily A4                                             | Aldh1a4 | M23995   | metabolism                                           | 4.24*   | 6.76*  | 4.22*  | 0.00031 |
| 40           | phosphoenolpyruvate carboxykinase                                                         |         | K03243   | metabolism                                           | 0.43*   | 0.22*  | 0.24*  | 0.00011 |
| 40           | carbonic anhydrase 3                                                                      | Ca3     | M22413   | metabolism                                           | 0.3*    | 0.19*  | 0.2*   | 0.00010 |
| 40           | acyl-Coenzyme A oxidase 2, branched chain                                                 | Acox2   | X95189   | metabolism                                           | 0.31*   | 0.29*  | 0.27*  | 0.00009 |
| 40           | Phosphoinositide 3-kinase, regulatory subunit, polypeptide 1 (p85 alpha)                  | Pik3r1  | D64045   | intracellular transducers/ effectors/modulators      | 0.35*   | 0.27*  | 0.65*  | 0.00040 |
| 40           | GTP-binding protein (G-alpha-i2)                                                          | Gnai2   | M17528   | intracellular transducers/ effectors/modulators      | 0.44*   | 0.6*   | 1.72*  |         |
| 40           | guanine nucleotide binding protein, alpha 12                                              | Gna12   | D85760   | intracellular transducers/ effectors/modulators      | 0.33*   | 0.42*  | 1.48*  |         |
| 40           | cold shock domain protein A                                                               | Csda    | U22893   | DNA binding and chromatin proteins                   | 0.57*   | 0.64*  | 1.96*  |         |
| 40           | leukemia inhibitory factor                                                                | Lif     | M32748   | cell signaling, extracellular communication proteins | 0.34*   | 0.23*  | 0.46*  | 0.00040 |
| 40           | hepatocyte growth factor                                                                  | Hgf     | D90102   | cell signaling, extracellular communication proteins | 0.48*   | 0.54*  | 0.67*  | 0.00031 |
| 40           | interleukin 6 receptor                                                                    | Il6r    | M58587   | cell receptors (by ligands)                          | 0.24*   | 0.17*  | 0.37*  | 0.00040 |
| 40           | Interleukin 1 receptor, type 1                                                            | Il1r1   | M95578   | cell receptors (by ligands)                          | 0.33*   | 0.26*  | 0.5*   | 0.00020 |
| 40           | epidermal growth factor receptor                                                          | Egfr    | M37394   | cell receptors (by ligands)                          | 0.43*   | 0.43*  | 0.52*  | 0.00012 |
| 40           | Retinoid X receptor alpha                                                                 | Rxra    | L06482   | cell receptors (by ligands)                          | 0.17*   | 0.21*  | 0.7*   | 0.00042 |

Table W1. (continued)

| Venn Section | Gene Name                                                                    | Symbol  | Genbank  | Functional Classification                           | Ratio   |        |        | FDR     |
|--------------|------------------------------------------------------------------------------|---------|----------|-----------------------------------------------------|---------|--------|--------|---------|
|              |                                                                              |         |          |                                                     | ENT1/NL | ENT5/L | HCC/NL |         |
| 40           | Integrin, beta 1                                                             | Itgb1   | U12309   | cell receptors (by ligands)                         | 2.15*   | 2.42*  | 1.29*  | 0.00042 |
| 40           | ribosomal protein L24                                                        | Rp124   | X78443   |                                                     | 2.72*   | 3.12*  | 1.44*  | 0.00046 |
| 40           | cytochrome P450, 8b1, sterol 12 alpha-hydrolase                              | Cyp8b1  | AB018596 |                                                     | 0.47    | 0.26*  | 0.29*  | 0.00039 |
| 43           | rap7a                                                                        | Dap     | U05334   |                                                     | 2.56*   | 3.81*  | 2.73*  | 0.00006 |
| 43           | probasin                                                                     | Pbsn    | M27156   |                                                     | 0.46*   | 0.48*  | 0.58*  | 0.00012 |
| 43           | retinoblastoma binding protein 7                                             | Rbbp7   | AF090306 | transcription                                       | 0.58    | 0.59*  | 1.19   |         |
| 43           | nuclear factor I/X                                                           | Nfix    | AB012234 | transcription                                       | 0.47    | 0.48*  | 0.83   | 0.00042 |
| 43           | alpha1-antitrypsin promoter binding protein 2 (ATBP2)                        | Hivep1  | X54250   | transcription                                       | 0.42    | 0.47*  | 0.81   | 0.00040 |
| 43           | Retinoblastoma-related gene                                                  | Rbl2    | D55627   | transcription                                       | 0.44    | 0.48*  | 0.77   | 0.00049 |
| 43           | heat shock 10 kDa protein 1                                                  | Hspe1   | X71429   | stress response proteins                            | 1.54    | 1.85*  | 0.9    |         |
| 43           | T-complex 1                                                                  | Tcp1    | D90345   | stress response proteins                            | 0.88    | 1.2*   | 1.14   |         |
| 43           | growth arrest and DNA-damage-inducible 45 alpha                              | Gadd45a | L32591   | stress response proteins                            | 0.42    | 0.34*  | 0.8    | 0.00045 |
| 43           | Finkel-Biskis-Reilly murine sarcoma virusubiquitously expressed              | Fau     | X62671   | protein turnover                                    | 0.49    | 0.41*  | 1.2    | 0.00070 |
| 43           | Peptidylprolyl isomerase A (cyclophilin A)                                   | Ppia    | M19533   | post-translational modification/<br>protein folding | 1.56    | 2.45*  | 1.16   |         |
| 43           | suppression of tumorigenicity 13 (colon carcinoma) Hsp70-interacting protein | St13    | X82021   | post-translational modification/<br>protein folding | 1.23    | 2.02*  | 1.66   | 0.00040 |
| 43           | avian sarcoma virus CT10 (v-crk) oncogene homolog                            | Crk     | D44481   | oncogenes and tumor suppressors                     | 0.38    | 0.29*  | 1.07   | 0.00045 |
| 43           | Kirsten rat sarcoma viral oncogene homologue 2 (active)                      | Kras2   | U09793   | oncogenes and tumor suppressors                     | 0.55    | 0.47*  | 1.24   |         |
| 43           | Superoxide dismutase 1, soluble                                              | Sod1    | Y00404   | metabolism                                          | 0.51    | 0.39*  | 0.92   | 0.00040 |
| 43           | acyl-coenzyme A:cholesterol acyltransferase                                  | Soat1   | D86373   | metabolism                                          | 0.42    | 0.36*  | 0.76   | 0.00050 |
| 40           | liver UDP-glucuronosyltransferase, phenobarbital inducible form              | Udpgr2  | M13506   | metabolism                                          | 0.88    | 0.3*   | 0.17   | 0.00040 |
| 40           | peroxiredoxin 1                                                              | Prdx1   | D30035   | metabolism                                          | 1.67    | 2.56*  | 1.55   | 0.00039 |
| 43           | mel transforming oncogene (derived from cell line NK14)- RAB8 homolog        | Rab8a   | M83675   | intracellular transducers/<br>effectors/modulators  | 0.49    | 0.58*  | 0.99   | 0.00048 |
| 43           | Protein phosphatase 2 (formerly 2A), catalytic subunit, alpha isoform        | Ppp2ca  | X16043   | intracellular transducers/<br>effectors/modulators  | 2.1     | 2.86*  | 1.05   | 0.00118 |
| 43           | mitogen activated protein kinase 1                                           | Mapk1   | M64300   | intracellular transducers/<br>effectors/modulators  | 0.36    | 0.4*   | 1.11   | 0.00082 |
| 43           | GTPase Rab14                                                                 | Rab14   | M83680   | intracellular transducers/<br>effectors/modulators  | 0.46    | 0.44*  | 0.89   | 0.00039 |
| 43           | calmodulin 3                                                                 | Calm3   | X13817   | intracellular transducers/<br>effectors/modulators  | 2.27    | 3.82*  | 1.36   | 0.00052 |
| 43           | adrenergic receptor, alpha 2c                                                | Adra2c  | M58316   | cell receptors (by ligands)                         | 0.52    | 0.55*  | 0.9    | 0.00043 |
| 43           | insulin-like growth factor 1 receptor                                        | Igf1r   | L29232   | cell receptors (by ligands)                         | 0.5     | 0.4*   | 0.92   | 0.00041 |
| 43           | nuclear receptor subfamily 1, group H, member 4                              | Nr1h4   | U18374   | cell receptors (by ligands)                         | 0.66    | 0.52*  | 0.89   |         |
| 43           | G protein-coupled receptor 27; gustatory receptor 27 (GUST27)                | Olr1867 | D12820   | cell receptors (by ligands)                         | 0.55    | 0.38*  | 0.77   | 0.00046 |
| 43           | parathyroid hormone receptor                                                 | Pthr1   | L19475   | cell receptors (by ligands)                         | 0.52    | 0.5*   | 0.71   | 0.00045 |
| 43           | defender against cell death 1                                                | Dad1    | Y13336   | cell receptors (by ligands)                         | 1.16    | 1.66*  | 1.15   | 0.00051 |
| 43           | galanin receptor 1                                                           | Galr1   | U30290   | cell receptors (by ligands)                         | 0.71    | 0.62*  | 0.77   | 0.00046 |
| 43           | leukemia inhibitor factor receptor alpha-chain                               | Lifr    | D86345   | cell receptors (by ligands)                         | 0.62    | 0.39*  | 0.57   | 0.00049 |
| 43           | 5-hydroxytryptamine (serotonin) receptor 2B                                  | Htr2b   | X66842   | cell receptors (by ligands)                         | 0.45    | 0.48*  | 0.58   | 0.00046 |
| 43           | androgen receptor                                                            | Ar      | M20133   | cell receptors (by activities)                      | 0.46    | 0.55*  | 0.73   | 0.00045 |
| 43           | cyclin-dependent kinase inhibitor 1B                                         | Cdkn1b  | D83792   | cell cycle                                          | 0.45    | 0.45*  | 0.85   | 0.00041 |
| 43           | small GTP-binding protein rab5                                               | Rab5a   | AF072935 |                                                     | 0.4     | 0.45*  | 0.95   |         |
| 43           | notch gene homolog 2, (Drosophila)                                           | Notch2  | M93661   |                                                     | 0.65    | 0.67*  | 0.95   |         |
| 43           | Secreted acidic cysteine-rich glycoprotein (osteonectin)                     | Sparc   | Y13714   |                                                     | 0.7     | 0.58*  | 0.9    |         |
| 43           | Sp1 transcription factor                                                     | Sp1     | D12768   |                                                     | 0.36    | 0.44*  | 0.87   | 0.00042 |
| 43           | thioredoxin                                                                  | Txn1    | X14878   |                                                     | 1.74    | 2.23*  | 1.19   | 0.00045 |
| 43           | collagen, type III, alpha 1                                                  | Col3a1  | M21354   |                                                     | 0.87    | 0.55*  | 0.86   |         |
| 43           | high mobility group AT-hook 1                                                | Hmga1   | X62875   |                                                     | 0.52    | 0.52*  | 0.78   | 0.00045 |
| 43           | profilin                                                                     | Pfn1    | X96967   |                                                     | 1.44    | 1.69*  | 1.32   |         |
| 43           | non-muscle myosin alkali light chain                                         |         | S77858   |                                                     | 2.41    | 2.64*  | 1.28   | 0.00040 |
| 43           | CCAAT/enhancer binding protein, gamma                                        | Cebpg   | X64403   |                                                     | 0.36    | 0.31*  | 0.67   | 0.00041 |
| 43           | epidermal growth factor                                                      | Egf     | U04842   |                                                     | 0.82    | 0.55*  | 0.68   | 0.00046 |
| 69           | ribosomal protein S9                                                         | Rps9    | X66370   | translation                                         | 4.72*   | 4.5*   | 1.35   | 0.00039 |

Table W1. (continued)

| Venn Section | Gene Name                                              | Symbol  | Genbank  | Functional Classification                            | Ratio   |        |        | FDR     |
|--------------|--------------------------------------------------------|---------|----------|------------------------------------------------------|---------|--------|--------|---------|
|              |                                                        |         |          |                                                      | ENT1/NL | ENT5/L | HCC/NL |         |
| 69           | ribosomal protein S3                                   | Rps3    | X51536   | translation                                          | 4.7*    | 5.08*  | 1.28   | 0.00049 |
| 69           | nucleophosmin 1                                        | Npm1    | J03969   | translation                                          | 2.09*   | 2.63*  | 1.49   | 0.00045 |
| 69           | hepatocyte nuclear factor 4, alpha                     | Hnf4a   | D10554   | transcription                                        | 0.24*   | 0.22*  | 0.81   | 0.00040 |
| 69           | zinc finger protein 36                                 | Zfp36   | X63369   | transcription                                        | 0.34*   | 0.34*  | 0.8    | 0.00040 |
| 69           | presenilin 1                                           | Psen1   | D82363   | trafficking/targeting proteins                       | 0.29*   | 0.31*  | 1.08   | 0.00046 |
| 69           | ATP-binding cassette, sub-family B (MDR/TAP), member 4 | Abcb4   | L15079   | stress response proteins                             | 0.3*    | 0.29*  | 0.71   | 0.00046 |
| 69           | solute carrier family 22, member 5                     | Slc22a5 | AJ001933 | stress response proteins                             | 4.5*    | 6.32*  | 0.73   |         |
| 69           | heat shock 70kD protein 8                              |         | Y00054   | stress response proteins                             | 2.79*   | 2.99*  | 1.51   | 0.00040 |
| 69           | tissue inhibitor of metalloproteinase 2                | Timp2   | L31884   | protein turnover                                     | 0.46*   | 0.48*  | 0.97   | 0.00041 |
| 69           | cathepsin B                                            | Ctsb    | X82396   | protein turnover                                     | 3.04*   | 3*     | 1.07   | 0.00067 |
| 69           | polyubiquitin                                          | Ubb     | D16554   | protein turnover                                     | 0.36*   | 0.43*  | 0.95   | 0.00043 |
| 69           | ubiquitin conjugating enzyme                           | Ube2b   | M62388   | protein turnover                                     | 0.43*   | 0.42*  | 0.6    | 0.00048 |
| 69           | carboxypeptidase D                                     | Cpd     | U62897   | protein turnover                                     | 0.58*   | 0.53*  | 1.13   |         |
| 69           | P450 (cytochrome) oxidoreductase                       | Por     | M12516   | post-translational modification/<br>protein folding  | 0.36*   | 0.27*  | 1.07   | 0.00078 |
| 69           | chaperonin containing TCP1, subunit 3 (gamma)          |         | X74801   | post-translational modification/<br>protein folding  | 3.41*   | 4*     | 0.91   | 0.00111 |
| 69           | H-ras proto-oncogene; transforming protein p21         |         | M13011   | oncogenes and tumor suppressors                      | 0.37*   | 0.37*  | 0.96   | 0.00053 |
| 69           | cyclin D2                                              | Ccnd2   | D16308   | oncogenes and tumor suppressors                      | 0.42*   | 0.43*  | 0.94   | 0.00040 |
| 69           | phosphoglycerate kinase 1                              | Pgk1    | M31788   | metabolism                                           | 2.03*   | 2.14*  | 1.02   |         |
| 69           | cytochrome P450, 4a12                                  | Cyp4a12 | M37828   | metabolism                                           | 2.43*   | 2.73*  | 1.1    | 0.00042 |
| 69           | cytochrome c oxidase, subunit 4a                       | Cox4i1  | X14209   | metabolism                                           | 0.66*   | 0.68*  | 0.98   |         |
| 69           | 7-dehydrocholesterol reductase                         | Dhcr7   | AB016800 | metabolism                                           | 2.9*    | 3.49*  | 1.14   | 0.00109 |
| 69           | heme oxygenase 2                                       | Hmox2   | J05405   | metabolism                                           | 0.49*   | 0.43*  | 0.86   | 0.00041 |
| 69           | dopa/tyrosine sulfotransferase                         | Sult1b1 | U38419   | metabolism                                           | 1.53*   | 1.6*   | 0.88   |         |
| 69           | biliverdin reductase A                                 | Blvra   | M81681   | metabolism                                           | 0.38*   | 0.47*  | 0.93   | 0.00049 |
| 69           | Apolipoprotein A-IV                                    | Apoa4   | M00002   | metabolism                                           | 0.18*   | 0.09*  | 0.68   | 0.00041 |
| 69           | cytosolic acyl-CoA thioesterase 1                      | Cte1    | AB010428 | metabolism                                           | 0.32*   | 0.39*  | 1.27   | 0.00119 |
| 69           | transferrin receptor                                   | Tfrc    | M58040   | metabolism                                           | 1.37*   | 1.18*  | 1.27   |         |
| 69           | mitochondrial H+-ATP synthase alpha subunit            | Atp5a1  | X56133   | metabolism                                           | 4.06*   | 3.61*  | 1.15   | 0.00043 |
| 69           | carnitine palmitoyltransferase 1                       | Cpt1a   | L07736   | metabolism                                           | 0.25*   | 0.34*  | 0.71   | 0.00040 |
| 69           | Glyceraldehyde-3-phosphate dehydrogenase               | Gapd    | M17701   | metabolism                                           | 1.93*   | 2.04*  | 1.24   | 0.00051 |
| 69           | cytochrome c oxidase subunit Vb                        | Cox5b   | D10952   | metabolism                                           | 0.2*    | 0.22*  | 0.76   | 0.00040 |
| 69           | ATP-binding cassette, sub-family B (MDR/TAP), member 6 | Abcb6   | AJ003004 | membrane channels and transporters                   | 1.42*   | 2.19*  | 0.94   |         |
| 69           | inositol 1,4,5-triphosphate receptor type 1            | Itpr1   | U38665   | membrane channels and transporters                   | 0.41*   | 0.38*  | 0.75   | 0.00040 |
| 69           | A-raf                                                  | Araf1   | X06942   | intracellular transducers/<br>effectors/modulators   | 0.46*   | 0.56*  | 1      | 0.00052 |
| 69           | mitogen activated protein kinase kinase 2              | Map2k2  | D14592   | intracellular transducers/<br>effectors/modulators   | 0.37*   | 0.42*  | 1.08   | 0.00061 |
| 69           | p38 mitogen activated protein kinase                   | Mapk14  | U73142   | intracellular transducers/<br>effectors/modulators   | 0.33*   | 0.38*  | 1.14   | 0.00069 |
| 69           | RAS p21 protein activator 1                            | Rasa1   | L13151   | intracellular transducers/<br>effectors/modulators   | 0.42*   | 0.46*  | 1.16   | 0.00046 |
| 69           | Murine thymoma viral (v-akt) oncogene homolog 2        | Akt2    | D30041   | intracellular transducers/<br>effectors/modulators   | 0.4*    | 0.39*  | 0.82   | 0.00044 |
| 69           | mitogen-activated protein kinase 6                     | Mapk6   | M64301   | intracellular transducers/<br>effectors/modulators   | 0.47*   | 0.44*  | 1.22   |         |
| 69           | Insulin receptor substrate 1                           | Irs1    | X58375   | intracellular transducers/<br>effectors/modulators   | 0.39*   | 0.49*  | 0.76   | 0.00046 |
| 69           | insulin-like growth factor binding protein 1           | Igfbp1  | M89791   | extracellular transport/<br>carrier proteins         | 2.46*   | 2.5*   | 1.11   | 0.00059 |
| 69           | insulin-like growth factor binding protein 3           | Igfbp3  | M31837   | extracellular transport/carrier proteins             | 0.4*    | 0.61*  | 2.07   |         |
| 69           | 8-oxoguanine-DNA-glycosylase                           | Ogg1    | AF029690 | DNA synthesis,<br>recombination, and repair          | 0.48*   | 0.67*  | 1.04   |         |
| 69           | histone 2A                                             | H2a     | U95113   | DNA binding and chromatin proteins                   | 0.18*   | 0.23*  | 1.05   | 0.00070 |
| 69           | vimentin                                               | Vim     | X62952   | cytoskeleton/motility proteins                       | 0.48*   | 0.43*  | 1      | 0.00039 |
| 69           | alpha-tubulin                                          | Tuba1   | V01227   | cytoskeleton/motility proteins                       | 1.78*   | 2.24*  | 1.06   |         |
| 69           | fibroblast growth factor 10                            | Fgf10   | D79215   | cell signaling, extracellular communication proteins | 4.09*   | 4.24*  | 1.37   | 0.00079 |
| 69           | Glucose-dependent insulinotropic peptide               | Gip     | L08831   | cell signaling, extracellular communication proteins | 5.69*   | 4.04*  | 1.99   | 0.00052 |

Table W1. (continued)

| Venn Section | Gene Name                                                    | Symbol   | Genbank  | Functional Classification                            | Ratio   |        |        | FDR     |
|--------------|--------------------------------------------------------------|----------|----------|------------------------------------------------------|---------|--------|--------|---------|
|              |                                                              |          |          |                                                      | ENT1/NL | ENT5/L | HCC/NL |         |
| 69           | vascular endothelial growth factor                           | Vegfa    | M32167   | cell signaling, extracellular communication proteins | 0.34*   | 0.42*  | 1.16   | 0.00065 |
| 69           | interleukin 4 receptor                                       | Il4r     | X69903   | cell receptors (by ligands)                          | 0.26*   | 0.34*  | 0.89   | 0.00040 |
| 69           | met proto-oncogene                                           | Met      | U65007   | cell receptors (by ligands)                          | 0.34*   | 0.36*  | 0.66   | 0.00045 |
| 69           | insulin receptor                                             | Insr     | M29014   | cell receptors (by ligands)                          | 0.37*   | 0.42*  | 0.74   | 0.00052 |
| 69           | natriuretic peptide receptor 1                               | Npr1     | M74535   | cell receptors (by ligands)                          | 0.36*   | 0.44*  | 0.66   | 0.00052 |
| 69           | growth hormone receptor                                      | Ghr      | J04811   | cell receptors (by ligands)                          | 0.41*   | 0.35*  | 0.56   | 0.00050 |
| 69           | Low density lipoprotein receptor                             | Ldlr     | X13722   | cell receptors (by ligands)                          | 0.43*   | 0.42*  | 0.62   | 0.00032 |
| 69           | Peroxisome proliferator activated receptor alpha             | Ppara    | M88592   | cell receptors (by activities)                       | 0.26*   | 0.38*  | 0.94   | 0.00050 |
| 69           | nuclear receptor subfamily 1, group D, member 1              | Nr1d1    | M25804   | cell receptors (by activities)                       | 0.24*   | 0.35*  | 0.71   | 0.00045 |
| 69           | Cyclin D3                                                    | Ccnd3    | D16309   | cell cycle                                           | 0.31*   | 0.31*  | 0.81   | 0.00043 |
| 69           | tenascin                                                     |          | U15550   | cell adhesion receptors/ proteins                    | 0.55*   | 0.58*  | 0.9    | 0.00046 |
| 69           | tumor necrosis factor receptor superfamily, member 1         | Tnfrsf1a | M63122   | apoptosis associated proteins                        | 0.23*   | 0.23*  | 1.05   | 0.00047 |
| 69           | B cell lymphoma 2 like                                       | Bcl2l1   | U72350   | apoptosis associated proteins                        | 0.3*    | 0.32*  | 0.81   | 0.00040 |
| 69           | myeloid cell leukemia sequence 1                             | Mcl1     | AF115380 | apoptosis associated proteins                        | 0.62*   | 0.44*  | 1.14   |         |
| 69           | UDP-glucuronosyltransferase 1 family, member 1               | Ugt1a1   | U20551   |                                                      | 0.49*   | 0.45*  | 0.88   | 0.00039 |
| 69           | cytochrome bc-1 complex core P                               |          | S74321   |                                                      | 1.69*   | 1.57*  | 1.13   |         |
| 69           | cell growth regulatory with ring finger domain               | Cgrrf1   | U66471   |                                                      | 0.38*   | 0.45*  | 0.78   | 0.00044 |
| 69           | K-kininogen, differential splicing leads to HMW Kngk         | Kng_v1   | L29428   |                                                      | 3.58*   | 3.49*  | 1.4    | 0.00043 |
| 69           | nuclear factor kappa B subunit p65 (NFkB)                    |          | AF079314 |                                                      | 0.39*   | 0.48*  | 1.24   | 0.00095 |
| 69           | metallothionein 3                                            | Mt3      | S65838   |                                                      | 5.56*   | 2.52*  | 0.78   | 0.00128 |
| 69           | 17-beta hydroxysteroid dehydrogenase type 2                  | Hsd17b2  | X91234   |                                                      | 0.72    | 0.8    | 0.5*   | 0.00052 |
| 69           | actin, beta                                                  | Actb     | V01217   | cytoskeleton/motility proteins                       | 0.85    | 0.72   | 1.27*  |         |
| 69           | aldehyde dehydrogenase family 3, subfamily A2                | Aldh3a2  | M73714   | metabolism                                           | 1.41    | 0.98   | 0.63*  |         |
| 84           | alpha-2-HS-glycoprotein                                      | Ahsg     | X63446   | intracellular transducers/ effectors/modulators      | 0.98    | 0.45   | 0.43*  | 0.00045 |
| 84           | alpha-2-macroglobulin                                        | A2m      | J02635   | protein turnover                                     | 1.07    | 0.65   | 2.46*  |         |
| 84           | annexin 1                                                    | Anxa1    | M19967   | metabolism                                           | 0.93    | 2.75   | 5.02*  | 0.00053 |
| 84           | annexin 5                                                    | Anxa5    | M21730   | intracellular transducers/ effectors/modulators      | 1.39    | 1.43   | 3.63*  | 0.00039 |
| 84           | Apolipoprotein A-II                                          | Apoa2    | X03468   |                                                      | 1.16    | 0.65   | 0.32*  |         |
| 84           | apurinic/apyrimidinic endonuclease 1                         | Apex1    | D44495   | DNA synthesis, recombination, and repair             | 0.66    | 0.66   | 1.56*  |         |
| 84           | aquaporin 8                                                  | Aqp8     | AF007775 | membrane channels and transporters                   | 1.79    | 4.14   | 1.77*  | 0.00040 |
| 84           | arginase 1                                                   | Arg1     | J02720   | metabolism                                           | 1.3     | 0.72   | 0.49*  |         |
| 84           | arginosuccinate synthetase 1                                 | Ass      | M36708   | metabolism                                           | 0.76    | 0.47   | 0.31*  | 0.00044 |
| 84           | ATP-binding cassette, sub-family C (CFTR/MRP), member 3      | Abcc3    | AB010467 | stress response proteins                             | 0.7     | 0.84   | 1.52*  |         |
| 84           | Benzodiazepin receptor (peripheral)                          | Bzrp     | M84221   | cell receptors (by ligands)                          | 0.89    | 1.4    | 1.8*   |         |
| 84           | betaine-homocysteine methyltransferase                       | Bhmt     | AF038870 | metabolism                                           | 1.19    | 0.75   | 0.28*  | 0.00089 |
| 84           | calnexin                                                     | Canx     | L18889   | intracellular transducers/ effectors/modulators      | 0.9     | 0.94   | 0.71*  |         |
| 84           | calreticulin                                                 | Calr     | X53363   | intracellular transducers/ effectors/modulators      | 0.69    | 0.76   | 0.77*  |         |
| 84           | CD24 antigen                                                 | Cd24     | U49062   | cell adhesion receptors/ proteins                    | 1.05    | 0.93   | 1.53*  |         |
| 84           | cell division cycle 42 homolog (S. cerevisiae)               | Cdc42    | M35543   | intracellular transducers/ effectors/modulators      | 2.39    | 3.4    | 1.27*  | 0.00090 |
| 84           | C-reactive protein                                           | Crp      | M83176   | cell signaling, extracellular communication proteins | 1.38    | 0.78   | 0.32*  | 0.00099 |
| 84           | crystallin, beta B2                                          | Crybb2   | X16072   | stress response proteins                             | 0.49    | 0.65   | 0.65*  | 0.00041 |
| 84           | cytochrome P450 2B1                                          | Cyp2b1   | M11251   | metabolism                                           | 1.17    | 0.88   | 0.65*  |         |
| 84           | Cytochrome P450 IIA1 (hepatic steroid hydroxylase IIA1) gene | Cyp2a1   | J02669   | metabolism                                           | 0.83    | 0.39   | 0.34*  | 0.00039 |
| 84           | cytochrome P450, 1a2                                         | Cyp1a2   | K02422   | metabolism                                           | 1.52    | 0.66   | 0.22*  | 0.00088 |
| 84           | cytochrome P450, 7a1                                         | Cyp7a1   | J05460   | metabolism                                           | 0.97    | 0.61   | 0.33*  | 0.00046 |
| 84           | cytochrome P450, subfamily 17                                | Cyp17a1  | M21208   | metabolism                                           | 1.02    | 0.54   | 0.54*  | 0.00040 |
| 84           | cytochrome P450, subfamily 27b, polypeptide 1                | Cyp27b1  | AB001992 | metabolism                                           | 0.65    | 0.99   | 0.63*  | 0.00040 |

Table W1. (continued)

| Venn Section | Gene Name                                                                    | Symbol    | Genbank  | Functional Classification                       | Ratio   |        |        | FDR     |
|--------------|------------------------------------------------------------------------------|-----------|----------|-------------------------------------------------|---------|--------|--------|---------|
|              |                                                                              |           |          |                                                 | ENT1/NL | ENT5/L | HCC/NL |         |
| 84           | diazepam binding inhibitor                                                   | Dbi       | M14201   |                                                 | 1.57    | 1.28   | 0.6*   |         |
| 84           | Discoidin domain receptor family, member 1                                   | Ddr1      | L26525   | cell receptors (by activities)                  | 0.71    | 0.75   | 5.03*  |         |
| 84           | DNA polymerase beta                                                          | Polb      | J02776   | DNA synthesis, recombination, and repair        | 0.54    | 0.74   | 0.68*  | 0.00039 |
| 84           | enoyl Coenzyme A hydratase, short chain 1                                    | Echs1     | X15958   | metabolism                                      | 1.69    | 1.42   | 0.69*  |         |
| 84           | eukaryotic translation elongation factor 2                                   | Eef2      | K03502   | translation                                     | 0.75    | 0.52   | 1.29*  |         |
| 84           | fatty acid binding protein 5, epidermal                                      | Fabp5     | U13253   | metabolism                                      | 2.38    | 1.69   | 1.93*  | 0.00046 |
| 84           | Fibrinogen, gamma polypeptide                                                | Fgg       | J00734   |                                                 | 1.46    | 0.89   | 0.52*  |         |
| 84           | Fibronectin 1                                                                | Fn1       | X05834   | extracellular matrix proteins                   | 0.94    | 0.78   | 0.49*  | 0.00044 |
| 84           | Flavin-containing monooxygenase 1                                            | Fmo1      | M84719   | stress response proteins                        | 0.87    | 0.56   | 0.52*  | 0.00040 |
| 84           | fructose-1,6-bisphosphatase 1                                                | Fbp1      | M86240   | metabolism                                      | 1.39    | 1.05   | 0.51*  |         |
| 84           | gamma-glutamyl hydrolase                                                     | Ggh       | U38379   | metabolism                                      | 0.75    | 0.89   | 1.35*  |         |
| 84           | gamma-glutamyl transpeptidase                                                | Ggt1      | M33821   | metabolism                                      | 1.06    | 1.25   | 3.33*  | 0.00097 |
| 84           | gastric inhibitory peptide receptor                                          | Gipr      | L19660   | cell receptors (by ligands)                     | 0.82    | 0.93   | 0.67*  |         |
| 84           | glucose-6-phosphate dehydrogenase                                            | G6pdx     | X07467   | metabolism                                      | 1.6     | 2.92   | 3.42*  | 0.00050 |
| 84           | glutamate oxaloacetate transaminase 1                                        | Got1      | J04171   | metabolism                                      | 0.84    | 0.44   | 0.29*  | 0.00040 |
| 84           | glutathione reductase                                                        | Gsr       | U73174   | metabolism                                      | 0.97    | 1.57   | 2.35*  |         |
| 84           | glutathione synthetase                                                       | Gss       | L38615   | metabolism                                      | 0.55    | 0.68   | 2.62*  |         |
| 84           | glycine transporter 1                                                        | Slc6a9    | M88595   | membrane channels and transporters              | 0.44    | 0.69   | 2.39*  |         |
| 84           | guanine nucleotide binding protein, alpha o                                  | Gnao      | M17526   | intracellular transducers/ effectors/modulators | 0.49    | 0.42   | 0.42*  | 0.00048 |
| 84           | Huntington disease gene homolog                                              | Hdh       | U18650   | trafficking/targeting proteins                  | 1.09    | 0.53   | 0.6*   | 0.00108 |
| 84           | hydroxy-delta-5-steroid dehydrogenase, 3 beta- and steroid delta-isomerase   | Hsd3b     | M67465   | metabolism                                      | 0.54    | 0.51   | 0.36*  | 0.00040 |
| 84           | hydroxy-delta-5-steroid dehydrogenase, 3 beta- and steroid delta-isomerase 1 | Hsd3b1    | M38178   | metabolism                                      | 1.09    | 1.27   | 0.49*  |         |
| 84           | hydroxysteroid dehydrogenase 17 beta, type 7                                 | Hsd17b7   | U44803   | intracellular transducers/ effectors/modulators | 1.1     | 0.91   | 0.71*  |         |
| 84           | Inhibitor of DNA binding 2, dominant negative helix-loop-helix protein       | Id2       | D10863   | transcription                                   | 0.86    | 0.72   | 2.24*  |         |
| 84           | lactate dehydrogenase B                                                      | Ldhb      | U07181   | metabolism                                      | 0.63    | 0.92   | 1.94*  |         |
| 84           | laminin receptor 1 (67kD, ribosomal protein SA)                              | Lamr1     | D25224   |                                                 | 2.49    | 1.74   | 1.65*  | 0.00065 |
| 84           | Male germ cell-associated kinase                                             | Mak       | M35862   | intracellular transducers/ effectors/modulators | 0.74    | 0.85   | 1.36*  |         |
| 84           | mitogen-activated protein kinase 12                                          | Mapk12    | X96488   | intracellular transducers/ effectors/modulators | 0.65    | 0.47   | 0.55*  | 0.00039 |
| 84           | mouse double minute 2, human homolog of; p53-binding protein                 |           | Z12020   | transcription                                   | 0.53    | 0.65   | 1.61*  |         |
| 84           | neuropilin-2                                                                 | Nrp2      | AF016297 | cell receptors (by ligands)                     | 0.75    | 0.98   | 1.84*  |         |
| 84           | O6-methylguanine-DNA methyltransferase                                       | Mgmt      | X54862   | DNA synthesis, recombination, and repair        | 0.93    | 1.23   | 0.76*  |         |
| 84           | phospholipase A2, group VI                                                   | Pla2g6    | U51898   | metabolism                                      | 0.48    | 0.75   | 1.62*  |         |
| 84           | pre-alpha inhibitor heavy chain 3                                            | Itih3     | X83231   | protein turnover                                | 1.74    | 1.42   | 0.58*  |         |
| 84           | Prion protein, structural                                                    | Prnp      | D50093   |                                                 | 0.94    | 0.87   | 1.74*  |         |
| 84           | protein kinase inhibitor, alpha                                              | Pkia      | L02615   | intracellular transducers/ effectors/modulators | 0.72    | 0.94   | 2.08*  |         |
| 84           | Protein phosphatase 2 (formerly 2A), catalytic subunit, beta isoform         | Ppp2cb    | M23591   | intracellular transducers/ effectors/modulators | 0.84    | 1.06   | 1.99*  |         |
| 84           | Regucalcin                                                                   | Rgn       | D38467   | intracellular transducers/ effectors/modulators | 1.36    | 0.74   | 0.31*  | 0.00089 |
| 84           | ribosomal protein L15                                                        | Rpl15     | X78167   | translation                                     | 0.95    | 0.75   | 1.32*  |         |
| 84           | ribosomal protein L3                                                         | Rpl3      | X62166   |                                                 | 1.25    | 0.94   | 1.32*  |         |
| 84           | serine (or cysteine) proteinase inhibitor, clade H, member 1                 | Serpinh1  | M69246   | stress response proteins                        | 0.52    | 0.42   | 2.14*  |         |
| 84           | Serine protease inhibitor                                                    | Spin2c    | D00753   | protein turnover                                | 1.23    | 1.18   | 0.75*  |         |
| 84           | serine protease inhibitor 2.4                                                | Serpina3m | X69834   | protein turnover                                | 1.05    | 0.92   | 0.39*  |         |
| 84           | signal transducer and activator of transcription 1                           | Stat1     | AF205604 |                                                 | 1.08    | 1.07   | 0.64*  |         |
| 84           | sodium-dependent neutral amino acid transporter ASCT2                        | Slc1a5    | AJ132846 | membrane channels and transporters              | 0.53    | 0.72   | 0.61*  | 0.00043 |
| 84           | solute carrier family 17 vesicular glutamate transporter), member 1          | Slc17a1   | U28504   | membrane channels and transporters              | 1.47    | 3.33   | 3.6*   | 0.00049 |

**Table W1.** (continued)

| Venn Section | Gene Name                                                                                 | Symbol  | Genbank       | Functional Classification       | Ratio   |        |        | FDR     |
|--------------|-------------------------------------------------------------------------------------------|---------|---------------|---------------------------------|---------|--------|--------|---------|
|              |                                                                                           |         |               |                                 | ENT1/NL | ENT5/L | HCC/NL |         |
| 84           | solute carrier family 25 (mitochondrial adenine nucleotide translocator) member 4         | Slc25a4 | D12770        | metabolism                      | 1.73    | 1.3    | 1.53*  |         |
| 84           | syndecan 2                                                                                | Sdc2    | M81687        |                                 | 0.59    | 0.45   | 0.66*  | 0.00044 |
| 84           | testis-specific heat shock protein-related gene hst70                                     | Hspa2   | X15705        | stress response proteins        | 0.45    | 0.55   | 0.52*  | 0.00047 |
| 84           | thioredoxin reductase 1                                                                   | Txnrd1  | AF220760      |                                 | 1.15    | 2.3    | 3.88*  | 0.00043 |
| 84           | thymosin, beta 10                                                                         | Tmsb10  | M17698        |                                 | 1.05    | 1.12   | 4.79*  | 0.00073 |
| 84           | thyroid hormone receptor alpha                                                            | Thra    | X12744,M31177 | oncogenes and tumor suppressors | 0.61    | 0.62   | 0.75*  | 0.00039 |
| 84           | tyrosine 3-monooxygenase/tryptophan 5-monooxygenase activation protein, gamma polypeptide | Ywhag   | S55305        | metabolism                      | 1.02    | 1.35   | 2.04*  |         |
| 84           | Tyrosine 3-monooxygenase 5-monooxygenase activation protein, eta polypeptide              | Ywhah   | D17445        | metabolism                      | 0.53    | 0.92   | 1.54*  |         |
| 84           | Tyrosine 3-monooxygenase 5-monooxygenase activation protein, zeta polypeptide             | Ywhaz   | D17615        | metabolism                      | 0.51    | 0.71   | 1.66*  |         |
| 84           | tyrosine aminotransferase                                                                 | Tat     | M18340        | metabolism                      | 0.7     | 0.46   | 0.2*   | 0.00042 |
| 84           | urate oxidase                                                                             | Uox     | J03959        | metabolism                      | 1.66    | 0.86   | 0.36*  |         |
| 84           | zinc finger protein 354A                                                                  | Znf354a | M96548        | transcription                   | 0.52    | 0.37   | 0.22*  | 0.00048 |

Full list of differential genes classified according to Venn diagram (Figure 2).

\*Ratios are statistically different compared with NL ( $P \leq .05$ ).

**Table W2.** Functional Classification of the 290 Differential Genes.

| Functional Classification                            | Number of Genes | % of Genes |
|------------------------------------------------------|-----------------|------------|
| apoptosis associated proteins                        | 3               | 1.0        |
| cell adhesion receptors/proteins                     | 2               | 0.7        |
| cell cycle                                           | 2               | 0.7        |
| cell receptors                                       | 31              | 10.7       |
| cell signaling, extracellular communication proteins | 9               | 3.1        |
| cytoskeleton/motility proteins                       | 4               | 1.4        |
| DNA binding and chromatin proteins                   | 2               | 0.7        |
| DNA synthesis, recombination, and repair             | 4               | 1.4        |
| extracellular matrix proteins                        | 1               | 0.3        |
| extracellular transport/carrier proteins             | 4               | 1.4        |
| immune system proteins                               | 2               | 0.7        |
| intracellular transducers/effectors/modulators       | 30              | 10.3       |
| membrane channels and transporters                   | 8               | 2.8        |
| metabolism                                           | 80              | 27.6       |
| oncogenes and tumor suppressors                      | 6               | 2.1        |
| post-translational modification/protein folding      | 6               | 2.1        |
| protein turnover                                     | 17              | 5.9        |
| RNA processing, turnover, and transport              | 2               | 0.7        |
| stress response proteins                             | 18              | 6.2        |
| trafficking/targeting proteins                       | 6               | 2.1        |
| transcription                                        | 15              | 5.2        |
| translation                                          | 7               | 2.4        |
| unclassified                                         | 31              | 10.7       |
|                                                      | 290             | 100        |
